# Supplementary material for: Genetic and Pharmacological Inhibition of GCN2 Ameliorates Hyperglycemia and Insulin Resistance in Type 2 Diabetic Mice
Source: MDPI journal article supplement (doi:10.3390/antiox11081584), 2022-08-16
Supplement: s1 [file s1]

## **Supplemental Files**

Genetic and pharmacological inhibition of GCN2 ameliorates hyperglycemia  
and insulin resistance in type 2 diabetic mice

Juntao Yuan<sup>†</sup>, Fang Li<sup>†</sup>, Xiyue Shen<sup>†</sup>, Junling Gao, Zhuoran Yu, Kai Luo,  
Bingqing Cui, Zhongbing Lu\*

<sup>†</sup> These authors contributed equally to this work.

\* Correspondence

Zhongbing Lu, PhD

E-mail: luzhongbing@ucas.ac.cn

College of Life Science, University of Chinese Academy of Sciences

19A Yuquanlu, Beijing, 100049, China

Fax: 86-10-69672630; Tel: 86-10-69672630

**Table S1. Information for antibodies and reagents**

| Reagent or Resource                             | Source                    | Identifier      |
|-------------------------------------------------|---------------------------|-----------------|
| <b>Antibodies</b>                               |                           |                 |
| Rabbit monoclonal [EP1391Y] to Heme Oxygenase 1 | Abcam                     | Cat# ab52947    |
| Mouse monoclonal [A180] to NQO1                 | Abcam                     | Cat# ab28947    |
| Rabbit mAb to Fatty Acid Synthase (C20G5)       | Cell Signaling Technology | Cat# 3180       |
| Rabbit Polyclonal to GCN2                       | Cell Signaling Technology | Cat# 3302       |
| Rabbit Polyclonal to p-AKT (Thr308)             | Cell Signaling Technology | Cat# 13038      |
| Rabbit Polyclonal to AKT                        | Cell Signaling Technology | Cat# 9272       |
| Rabbit Polyclonal to $\beta$ -Tubulin           | Cell Signaling Technology | Cat# 2146       |
| Rabbit Polyclonal to NRF2                       | Proteintech               | Cat# 16396-1-AP |
| Rabbit Polyclonal to GLUT2                      | Signalway Antibody        | Cat# 45050      |
| Rabbit Polyclonal to GCK                        | Signalway Antibody        | Cat# 53975      |
| Rabbit Polyclonal to PDHB                       | Signalway Antibody        | Cat# 30766      |
| Rabbit Polyclonal to PYGL                       | Signalway Antibody        | Cat# 39121      |
| Rabbit polyclonal to CD36                       | Sino Biological Inc       | Cat# 80263-T48  |
| Rabbit polyclonal to Cidea                      | Sino Biological Inc       | Cat# 100879-T32 |

**Table S2. The quantitative real-time PCR primer information**

| Genes name                     | Accession     | Primers | Sequences (5'-3')                   | Length (bp) |
|--------------------------------|---------------|---------|-------------------------------------|-------------|
| <i>Acox1</i>                   | NM_001271898. | Forward | 5'-TGTCTCGCTCCGCTCATAGG -3'         | 436         |
|                                | 1             | Reverse | 5'- ACATGGAGTAATTGAGGCCAACA -<br>3' |             |
| <i>CD36</i>                    | NM_001159555. | Forward | 5'-CCTGCAAATGTCAGAGGAAA-3'          | 92          |
|                                | 1             | Reverse | 5'-GCGACATGATTAATGGCACA-3'          |             |
| <i>Cidea</i>                   | NM_007702.2   | Forward | 5'- AGAAGGTCCTACTGACCCCC -3'        | 266         |
|                                |               | Reverse | 5'- ACCCGGTGTCCATTCTGTC -3'         |             |
| <i>Dgat1</i>                   | NM_010046.3   | Forward | 5'- ATGGACTCTCCAGTTGACGC -3'        | 318         |
|                                |               | Reverse | 5'- TCGCACCTCGTCCTCTTCTA -3'        |             |
| <i>Fasn</i>                    | NM_007988.3   | Forward | 5'- CTCCACAGCTCTTCCAGTGAG -3'       | 246         |
|                                |               | Reverse | 5'- TCTCTAGAGGGCTTGACCA -3'         |             |
| <i>Fsp27</i>                   | NM_001301295. | Forward | 5'- GGGAGGTCCAACACAATCCAA-3'        | 222         |
|                                | 1             | Reverse | 5'- CTCCAAGCTGTGAGCCATGA-3'         |             |
| <i>Ppar<math>\gamma</math></i> | NM_001127330. | Forward | 5'- GCGGAAGAAGAGACCTGGG -3'         | 116         |
|                                | 2             | Reverse | 5'- GTGTGACTTCTCCTCAGCCC -3'        |             |
| <i>Scd1</i>                    | NM_009127.4   | Forward | 5'- CGCTGGCACATCAACTTCAC-3'         | 162         |
|                                |               | Reverse | 5'- AGGAACTCAGAAGCCCAAAGC -3'       |             |
| <i>18S</i>                     | NR_003278.3   | Forward | 5'-AGGAATTGACGGAAGGGCACCAC-         | 327         |
|                                |               | Reverse | 3'                                  |             |
|                                |               |         | 5'-GTGCAGCCCCGGACATCTAAGG-3'        |             |

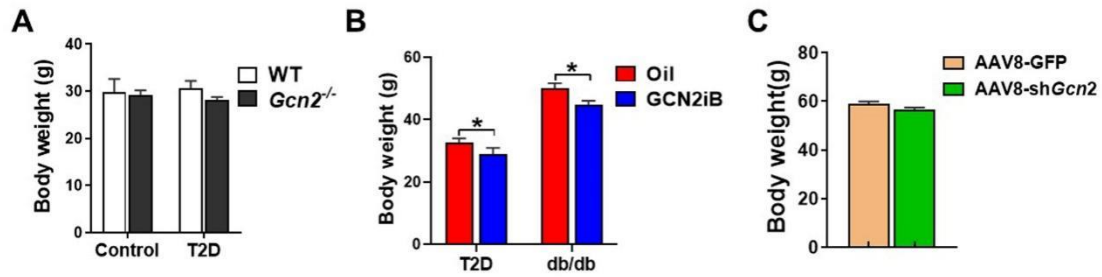

**Figure S1. Effect of GCN2 inhibition on bodyweight of type 2 diabetic mice.**

(A) Type 2 diabetes (T2D) was induced in wild type (WT) and *Gcn2*<sup>-/-</sup> mice with a high-fat diet (HFD) plus low-dose strepto-zotocin (STZ) injection. At the end of the experiments, body weight was recorded. (B) After treatment with oil or GCN2iB (3 mg/kg, every other day) for 6 weeks, bodyweight of HFD plus low-dose STZ injection-induced T2D mice and db/db mice were recorded. (C) After tail intravenous injection of AAV8-GFP or AAV8-sh*Gcn2* for 4 weeks, the bodyweight of db/db mice were recorded. N=5; values represent the mean  $\pm$  SD;

\* indicates  $p < 0.05$ .
